# Supplementary material
Source: Research Square preprint supplement (doi:10.21203/rs.3.rs-9240762/v1)
Supplement: Supplementary file 1 [file b4f363abb786a4685b2ff2af.docx]

**Supplementary Material**

# Biomimetic Apoptotic Nanovesicles Derived from T Cells Target Neuroinflammation and Enhance Neural Regeneration via TGFBR2-Mediated Signaling for Spinal Cord Injury Repair

Ziqi Zhu1, #, Beiduo Shen1, #, Tianyu Li6, #, Qingyue Yuan4, #, Da Tan5, Yiyang Cheng5, Wenxin Liang5, Qiang Zhou5 *, Xianzhen Chen4,5 *, Mingran Luo3, *, Xie Tao 2, *

1 Department of Spine Surgery, Shanghai East Hospital, School of Medicine, Tongji University, Shanghai, 200092, China.

2 Department of Orthopedic Surgery, Affiliated Hangzhou First People’s Hospital, Westlake University, School of Medicine, Hangzhou, China.

3 Department of Orthopedics, the Affiliated Hospital of Xuzhou Medical University, Xuzhou, 221000, China.

4 Department of Neurosurgery, School of Clinical Medicine of Nanjing Medical University, Nanjing 211166, Jiangsu, China.

5 Department of Neurosurgery, Shanghai Tenth People’ s Hospital, Tongji University School of Medicine, Shanghai 200000, China.

6 Clinical college of Anhui medical university, Hefei, 230031, China.

# These authors contributed equally to this work.

* Corresponding authors: Qiang Zhou, [zqreadmore@163.com](mailto:zqreadmore@163.com); Xianzhen Chen, chenxianzheny@tongji.edu.cn; Mingran Luo, [mingran_luo@sina.com;](mailto:%20mingran_luo@sina.com;) Xie Tao todxietao@163.com

**Fig. S1.** Hydrodynamic diameter distribution of Apo-nanovesicles as determined by nanoparticle tracking analysis (NTA).


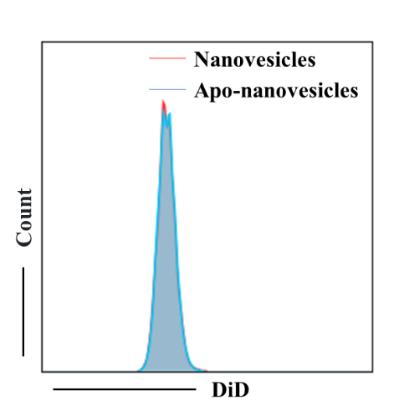


**Fig. S2.** Flow cytometry analysis of NSCs phagocytosed with nanovesicles.


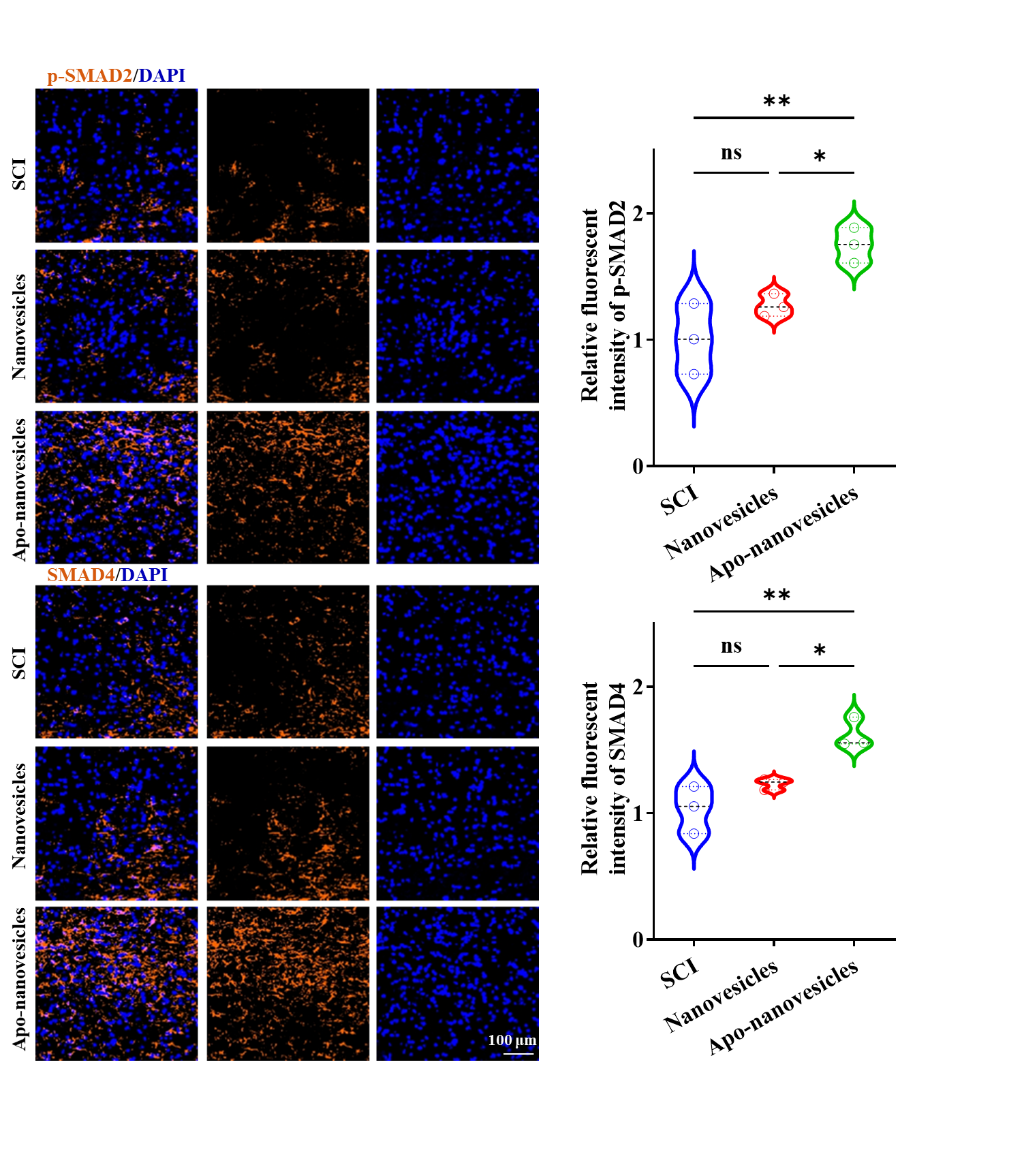


**Fig. S3.** Representative immunofluorescence images and quantitative analysis of immunofluorescence intensity for p-SMAD2 and SMAD4.

Table S1. qPCR primer.

| Gene | Forward primer | Reverse primer |
| --- | --- | --- |
| *Tnf-α* | ATGCTGGGACAGTGACCTGG | CCTTGATGGTGGTGCATGAG |
| *Il-1β* | TGGACCTTCCAGGATGAGGACA | GTTCATCTCGGAGCCTGTAGTG |
| *Il-10* | GCTGGACAACATACTGCTAACC | ATTTCCGATAAGGCTTGGCAA |
| *Tgf-β* | TGATACGCCTGAGTGGCTGTCT | CACAAGAGCAGTGAGCGCTGAA |
| *Iba1* | TCTGCCGTCCAAACTTGAAGCC | CTCTTCAGCTCTAGGTGGGTCT |
| *iNOS* | GAGACAGGGAAGTCTGAAGCAC | CCAGCAGTAGTTGCTCCTCTTC |
| *Arg1* | CATTGGCTTGCGAGACGTAGAC | GCTGAAGGTCTCTTCCATCACC |
| *Gfap* | CCCTGGCTCGTGTGGATTT | GACCGATACCACTCCTCTGTC |
| *Dcx* | CTGACTCAGGTAACGACCAAGAC | TTCCAGGGCTTGTGGGTGTAGA |
| *NeuN* | AACCACGAACTCCACCCTTC | GACCTCAATTTTCCGTCCCTC |
| *Map2* | GGTCACAGGGCACCTATTCA | TGTTCACCTTTCAGGACTGC |
| *Tuj1* | TAGACCCCAGCGGCAACTAT | GTTCCAGGTTCCAAGTCCACC |
| *Tgfbr2* | CCTACTCTGTCTGTGGATGACC | GACATCCGTCTGCTTGAACGAC |
| *Gapdh* | GTGTTCCTACCCCCAATGTGT | ATTGTCATACCAGGAAATGAGCTT |
